# Supplementary material
Source: HighWire-hosted journal article supplement (https://heart.bmj.com/content/heartjnl-2018-314590)
Supplement: inline-supplementary-material-1 [file inline-supplementary-material-1.docx]

# ***Supplementary information***

**Combined Association of Key Risk Factors on Ischemic Outcomes and Bleeding in Patients with Myocardial Infarction**

Daniel Lindholm, MD, PhD; Giovanna Sarno, MD, PhD; David Erlinge, MD, PhD; Bodil Svennblad, PhD;
Pål Hasvold, PhD; Magnus Janzon, MD, PhD; Tomas Jernberg, MD, PhD; Stefan James, MD, PhD

**Contents**

| **Table S1** | Baseline characteristics in relation to number of risk factors | *Page 2* |
| --- | --- | --- |
| **Table S2** | Competing risk models | *Page 3* |
| **Table S3** | Incidence rates of CVD/MI/Stroke and major bleeding across different combinations of risk factors (ordered by number of risk factors) | *Page 4* |
| **Figure S1** | Kaplan-Meier estimates of cardiovascular death in relation to risk factors | *Page 5* |
| **Figure S2** | Landmark analysis | *Page 6* |
| **Figure S3** | Kaplan-Meier estimates of CVD/MI/Stroke in relation to risk factors, censoring for death, end of follow-up and bleeding event | *Page 9* |
| **Figure S4** | Kaplan-Meier estimates of major bleeding in relation to risk factors, censoring for death, end of follow-up and ischemic event | *Page 10* |
| **Figure S5** | Combinations of risk factors (including also combinations with less than 30 patients) | *Page 11* |

**Table S1:** Baseline characteristics in relation to number of risk factors

| Variable | N | Number of risk factors | | | | | | |
| --- | --- | --- | --- | --- | --- | --- | --- | --- |
| **0** | **1** | **2** | **3** | **4** | **5** | **6** |
| n = 16,863 | n = 28,538 | n = 27,614 | n = 17,354 | n = 7900 | n = 2340 | n = 270 |
| Sex: male | 100,879 | 12,348 (73.2%) | 19913 (69.8%) | 18699 (67.7%) | 11601 (66.8%) | 5338 (67.6%) | 1572 (67.2%) | 163 (60.4%) |
| female |  | 4,515 (26.8%) | 8625 (30.2%) | 8915 (32.3%) | 5753 (33.2%) | 2562 (32.4%) | 768 (32.8%) | 107 (39.6%) |
| Follow-up (years) | 100,879 | 4.2 (2.1–6.3) | 3.9 (2.0–6.1) | 3.6 (1.7–5.8) | 3.1 (1.3–5.3) | 2.6 (1.0–4.8) | 2.1 (0.7–4.1) | 1.6 (0.6–3.8) |
| Age | 100,879 | 56 (50–61) | 64 (58–71) | 71 (66–78) | 75 (69–81) | 76 (71–82) | 77 (72–82) | 78 (72–81) |
| Admission year: 2006 | 100,879 | 884 (5.2%) | 1506 (5.3%) | 1541 (5.6%) | 1005 (5.8%) | 482 (6.1%) | 146 (6.2%) | 12 (4.4%) |
| 2007 |  | 2,157 (12.8%) | 3366 (11.8%) | 3185 (11.5%) | 2057 (11.9%) | 911 (11.5%) | 272 (11.6%) | 24 (8.9%) |
| 2008 |  | 2052 (12.2%) | 3450 (12.1%) | 3257 (11.8%) | 1994 (11.5%) | 899 (11.4%) | 261 (11.2%) | 29 (10.7%) |
| 2009 |  | 2019 (12.0%) | 3349 (11.7%) | 3187 (11.5%) | 1990 (11.5%) | 928 (11.7%) | 252 (10.8%) | 31 (11.5%) |
| 2010 |  | 1956 (11.6%) | 3486 (12.2%) | 3304 (12.0% | 2048 (11.8%) | 931 (11.8%) | 277 (11.8%) | 35 (13.0%) |
| 2011 |  | 2057 (12.2%) | 3390 (11.9%) | 3392 (12.3%) | 2097 (12.1%) | 925 (11.7%) | 289 (12.4%) | 30 (11.1%) |
| 2012 |  | 2033 (12.1%) | 3608 (12.6%) | 3502 (12.7%) | 2111 (12.2%) | 1022 (12.9%) | 300 (12.8%) | 36 (13.3%) |
| 2013 |  | 1952 (11.6%) | 3344 (11.7%) | 3294 (11.9%) | 2168 (12.5%) | 946 (12.0%) | 312 (13.3%) | 40 (14.8%) |
| 2014 |  | 1753 (10.4%) | 3039 (10.6%) | 2952 (10.7%) | 1884 (10.9%) | 856 (10.8%) | 231 (9.9%) | 33 (12.2%) |
| Smoking | 99,283 | 6895 (41.1%) | 8419 (29.8%) | 5542 (20.4%) | 2635 (15.6%) | 932 (12.2%) | 238 (10.5%) | 23 (8.7%) |
| Age ≥ 65 | 100,879 | 0 (0.0%) | 14111 (49.4%) | 5162 (18.7%) | 15684 (91.0%) | 7555 (95.6%) | 2297 (98.2%) | 270 (100%) |
| Multivessel disease | 100,879 | 0 (0.0%) | 10161 (35.6%) | 17953 (65.0%) | 14168 (81.6%) | 7230 (91.5%) | 2264 (96.8%) | 270 (100%) |
| Chronic kidney disease | 100,879 | 0 (0.0%) | 726 (2.5%) | 5017 (18.2%) | 8006 (46.1%) | 5444 (68.9%) | 2069 (88.4%) | 270 (100%) |
| Diabetes mellitus | 100,879 | 0 (0.0%) | 1811 (6.3%) | 4439 (16.1%) | 5923 (34.1%) | 4526 (57.3%) | 1937 (82.8%) | 270 (100%) |
| Prior myocardial infarction | 100,879 | 0 (0.0%) | 1206 (4.2%) | 3828 (13.9%) | 6033 (34.8%) | 5013 (63.5%) | 2076 (88.7%) | 270 (100%) |
| Prior major bleeding | 100,879 | 0 (0.0%) | 523 (1.8%) | 1539 (5.6%) | 2148 (12.8%) | 1832 (23.2%) | 1057 (45.2%) | 270 (100%) |
| Previous stroke | 100,879 | 154 (0.9%) | 709 (2.5%) | 1407 (5.1%) | 1586 (9.1%) | 1092 (13.8%) | 427 (18.2%) | 64 (23.7%) |
| Previous atrial fibrillation | 100,879 | 265 (1.6%) | 1074 (3.8%) | 1767 (6.4%) | 1857 (10.7%) | 1134 (14.4%) | 488 (20.9%) | 70 (25.9%) |
| Previous heart failure | 100,879 | 76 (0.5%) | 384 (1.3%) | 980 (3.5%) | 1538 (8.9%) | 1342 (17.0%) | 728 (31.1%) | 105 (38.9%) |
| Previous angina pectoris | 100,879 | 368 (2.2%) | 1831 (6.4%) | 3849 (13.9%) | 4519 (26.0%) | 3295 (41.7%) | 1333 (57.0%) | 181 (67.0%) |
| Previous peripheral arterial disease | 100,879 | 49 (0.3%) | 246 (0.9%) | 534 (1.9%) | 663 (3.8%) | 612 (7.7%) | 303 (12.9%) | 41 (15.2%) |
| Hypertension | 100,879 | 4737 (28.1%) | 11470 (40.2%) | 15016 (54.4%) | 11903 (68.6%) | 6094 (77.1%) | 1917 (81.9%) | 242 (89.6%) |
| Hyperlipidemia | 100,862 | 16225 (96.2%) | 27315 (95.7%) | 25909 (93.8%) | 15904 (91.7%) | 7170 (90.8%) | 2101 (89.8%) | 239 (88.5%) |

**Table S2:** Competing risk models (according to the Fine & Gray approach)

|  | **Adjusted* HR** (95%CI) | |
| --- | --- | --- |
|  | **CVD / MI / Stroke** | **Major bleeding** |
| **Age ≥ 65 years** | 1.69 (1.63 – 1.74) | 1.93 (1.81 – 2.05) |
| **MVD** | 1.51 (1.47 – 1.56) | 1.04 (0.99 – 1.10) |
| **CKD** | 1.75 (1.69 – 1.80) | 1.24 (1.17 – 1.31) |
| **Diabetes** | 1.41 (1.36 – 1.45) | 1.15 (1.08 – 1.22) |
| **Prior MI** | 1.69 (1.64 – 1.75) | 1.02 (0.96 – 1.09) |
| **Prior Bleeding** | 1.30 (1.24 – 1.36) | 2.07 (1.93 – 2.23) |
| * = Adjusted for sex and the other risk factors in the table | | |

**Table S3:** Incidence rates of CVD/MI/Stroke and major bleeding across different combinations of risk factors (ordered by number of risk factors)

| **Risk factors** | **Risk factor count** | **n** | **Events / 100 person-years (95%CI)** | |
| --- | --- | --- | --- | --- |
| **CVD/MI/Stroke** | **Major bleeding** |
| None | 0 | 16863 | 1.9 (1.8–2) | 0.7 (0.6–0.7) |
| MVD | 1 | 10161 | 3 (2.8–3.1) | 0.7 (0.7–0.8) |
| CKD | 1 | 726 | 4.3 (3.5–5.1) | 1.1 (0.8–1.6) |
| diabetes | 1 | 1811 | 3 (2.6–3.5) | 0.9 (0.7–1.1) |
| priorMI | 1 | 1206 | 5.2 (4.6–5.8) | 1 (0.7–1.3) |
| ageGE65 | 1 | 14111 | 3.8 (3.6–4) | 1.5 (1.4–1.6) |
| priorBleeding | 1 | 523 | 3.8 (3–4.8) | 2.4 (1.7–3.2) |
| MVD + CKD | 2 | 537 | 6.5 (5.4–7.8) | 1.2 (0.8–1.8) |
| MVD + diabetes | 2 | 1891 | 5.5 (4.9–6) | 1.1 (0.9–1.4) |
| MVD + priorMI | 2 | 1522 | 6.2 (5.6–6.8) | 0.8 (0.6–1) |
| MVD + ageGE65 | 2 | 13674 | 5.9 (5.6–6.1) | 1.9 (1.7–2) |
| MVD + priorBleeding | 2 | 329 | 4.8 (3.7–6.2) | 3.5 (2.6–4.7) |
| CKD + diabetes | 2 | 174 | 6.9 (5–9.3) | 2.6 (1.6–4.2) |
| CKD + priorMI | 2 | 87 | 6.2 (3.9–9.3) | 1.7 (0.7–3.5) |
| CKD + ageGE65 | 2 | 4167 | 7.8 (7.4–8.3) | 2.4 (2.1–2.7) |
| CKD + priorBleeding | 2 | 52 | 5.6 (2.8–10.3) | 3.6 (1.5–7.4) |
| diabetes + priorMI | 2 | 359 | 8.2 (6.7–9.9) | 2.2 (1.5–3) |
| diabetes + ageGE65 | 2 | 1893 | 5.9 (5.3–6.5) | 2.1 (1.7–2.5) |
| diabetes + priorBleeding | 2 | 122 | 5.6 (3.7–8.2) | 3.1 (1.8–5.1) |
| priorMI + ageGE65 | 2 | 1771 | 7.4 (6.8–8.1) | 1.8 (1.5–2.1) |
| priorMI + priorBleeding | 2 | 89 | 7.4 (4.9–10.8) | 3.3 (1.8–5.6) |
| ageGE65 + priorBleeding | 2 | 947 | 6.5 (5.6–7.5) | 3.9 (3.2–4.6) |
| MVD + CKD + diabetes | 3 | 332 | 8.7 (7.1–10.7) | 1.9 (1.3–2.9) |
| MVD + CKD + priorMI | 3 | 124 | 12.8 (9.6–16.7) | 2 (1–3.6) |
| MVD + CKD + ageGE65 | 3 | 5310 | 12.4 (11.8–12.9) | 2.7 (2.5–3) |
| MVD + CKD + priorBleeding | 3 | 49 | 11.1 (6.7–17.3) | 4.3 (1.9–8.4) |
| MVD + diabetes + priorMI | 3 | 683 | 10.2 (8.9–11.5) | 1.3 (1–1.8) |
| MVD + diabetes + ageGE65 | 3 | 2989 | 9.9 (9.2–10.6) | 2.1 (1.8–2.4) |
| MVD + diabetes + priorBleeding | 3 | 136 | 8.1 (5.7–11.2) | 2.6 (1.4–4.5) |
| MVD + priorMI + ageGE65 | 3 | 3483 | 10.9 (10.3–11.5) | 2.1 (1.9–2.4) |
| MVD + priorMI + priorBleeding | 3 | 121 | 7.1 (4.9–10.1) | 2.6 (1.4–4.5) |
| MVD + ageGE65 + priorBleeding | 3 | 941 | 9.3 (8.2–10.5) | 4.1 (3.4–4.9) |
| CKD + diabetes + priorMI | 3 | 50 | 8.6 (5–13.8) | 3.9 (1.7–7.6) |
| CKD + diabetes + ageGE65 | 3 | 926 | 11.8 (10.5–13.2) | 2.5 (2–3.2) |
| CKD + diabetes + priorBleeding | 3 | 27 | 10.7 (5–20.2) | 7 (2.7–15.3) |
| CKD + priorMI + ageGE65 | 3 | 775 | 13 (11.6–14.5) | 2.3 (1.8–3) |
| CKD + priorMI + priorBleeding | 3 | 17 | 9.5 (3.6–20.8) | 3.8 (0.8–12.1) |
| CKD + ageGE65 + priorBleeding | 3 | 396 | 13.9 (11.7–16.4) | 5.4 (4–7) |
| diabetes + priorMI + ageGE65 | 3 | 534 | 10.5 (9–12.2) | 2.5 (1.8–3.3) |
| diabetes + priorMI + priorBleeding | 3 | 31 | 11.3 (6–19.6) | 2.6 (0.7–6.9) |
| diabetes + ageGE65 + priorBleeding | 3 | 215 | 6.4 (4.6–8.7) | 5.8 (4.1–8.1) |
| priorMI + ageGE65 + priorBleeding | 3 | 215 | 11.3 (8.9–14.2) | 4.9 (3.4–6.7) |
| MVD + CKD + diabetes + priorMI | 4 | 161 | 22.7 (18.4–27.8) | 2.6 (1.5–4.2) |
| MVD + CKD + diabetes + ageGE65 | 4 | 1882 | 17.9 (16.7–19.2) | 3.1 (2.6–3.6) |
| MVD + CKD + diabetes + priorBleeding | 4 | 54 | 23.4 (15.4–34.3) | 8.7 (4.6–15.1) |
| MVD + CKD + priorMI + ageGE65 | 4 | 2141 | 18.3 (17.2–19.5) | 2.6 (2.3–3) |
| MVD + CKD + priorMI + priorBleeding | 4 | 32 | 10.8 (5.1–20.3) | 0 (0–2.9) |
| MVD + CKD + ageGE65 + priorBleeding | 4 | 574 | 17.1 (15–19.4) | 4.9 (3.9–6.2) |
| MVD + diabetes+ priorMI + ageGE65 | 4 | 271 | 21.4 (17.9–25.5) | 3.2 (2.1–4.8) |
| MVD + diabetes + priorMI + priorBleeding | 4 | 86 | 14.1 (10.1–19.2) | 4 (2.2–6.8) |
| MVD + diabetes + ageGE65 + priorBleeding | 4 | 86 | 14.1 (10.1–19.2) | 4 (2.2–6.8) |
| MVD + priorMI + ageGE65 + priorBleeding | 4 | 472 | 15.1 (13–17.4) | 4.7 (3.7–6) |
| CKD + diabetes + priorMI + ageGE65 | 4 | 316 | 19.2 (16.3–22.6) | 2.2 (1.4–3.3) |
| CKD + diabetes + priorMI + priorBleeding | 4 | 12 | 52 (26.7–92.2) | 3.7 (0.3–17.4) |
| CKD + diabetes + ageGE65 + priorBleeding | 4 | 117 | 15.4 (11.1–20.7) | 5.2 (3–8.5) |
| CKD + priorMI + ageGE65 + priorBleeding | 4 | 155 | 15.6 (12.1–19.8) | 5.9 (3.9–8.6) |
| diabetes + priorMI + ageGE65 + priorBleeding | 4 | 70 | 13.4 (8.7–19.8) | 4.2 (2–7.9) |
| MVD + CKD + diabetes + priorMI + ageGE65 | 5 | 1283 | 25.9 (24–27.9) | 3.1 (2.6–3.8) |
| MVD + CKD + diabetes + priorMI + priorBleeding | 5 | 43 | 22.1 (14.4–32.6) | 5.2 (2.3–10.2) |
| MVD + CKD + diabetes + ageGE65 + priorBleeding | 5 | 264 | 22.6 (18.7–27.1) | 7.9 (5.7–10.6) |
| MVD + CKD + priorMI + ageGE65 + priorBleeding | 5 | 403 | 24.7 (21.5–28.2) | 3.7 (2.6–5) |
| MVD + diabetes + priorMI + ageGE65 + priorBleeding | 5 | 271 | 21.4 (17.9–25.5) | 3.2 (2.1–4.8) |
| CKD + diabetes + priorMI + ageGE65 + priorBleeding | 5 | 76 | 20.5 (13.9–29.1) | 5.1 (2.4–9.6) |
| MVD + CKD + diabetes + priorMI + ageGE65 + priorBleeding | 6 | 270 | 28.4 (23.9–33.4) | 5.2 (3.6–7.3) |

**Figure S1:** Kaplan-Meier estimates of cardiovascular death in relation to risk factors


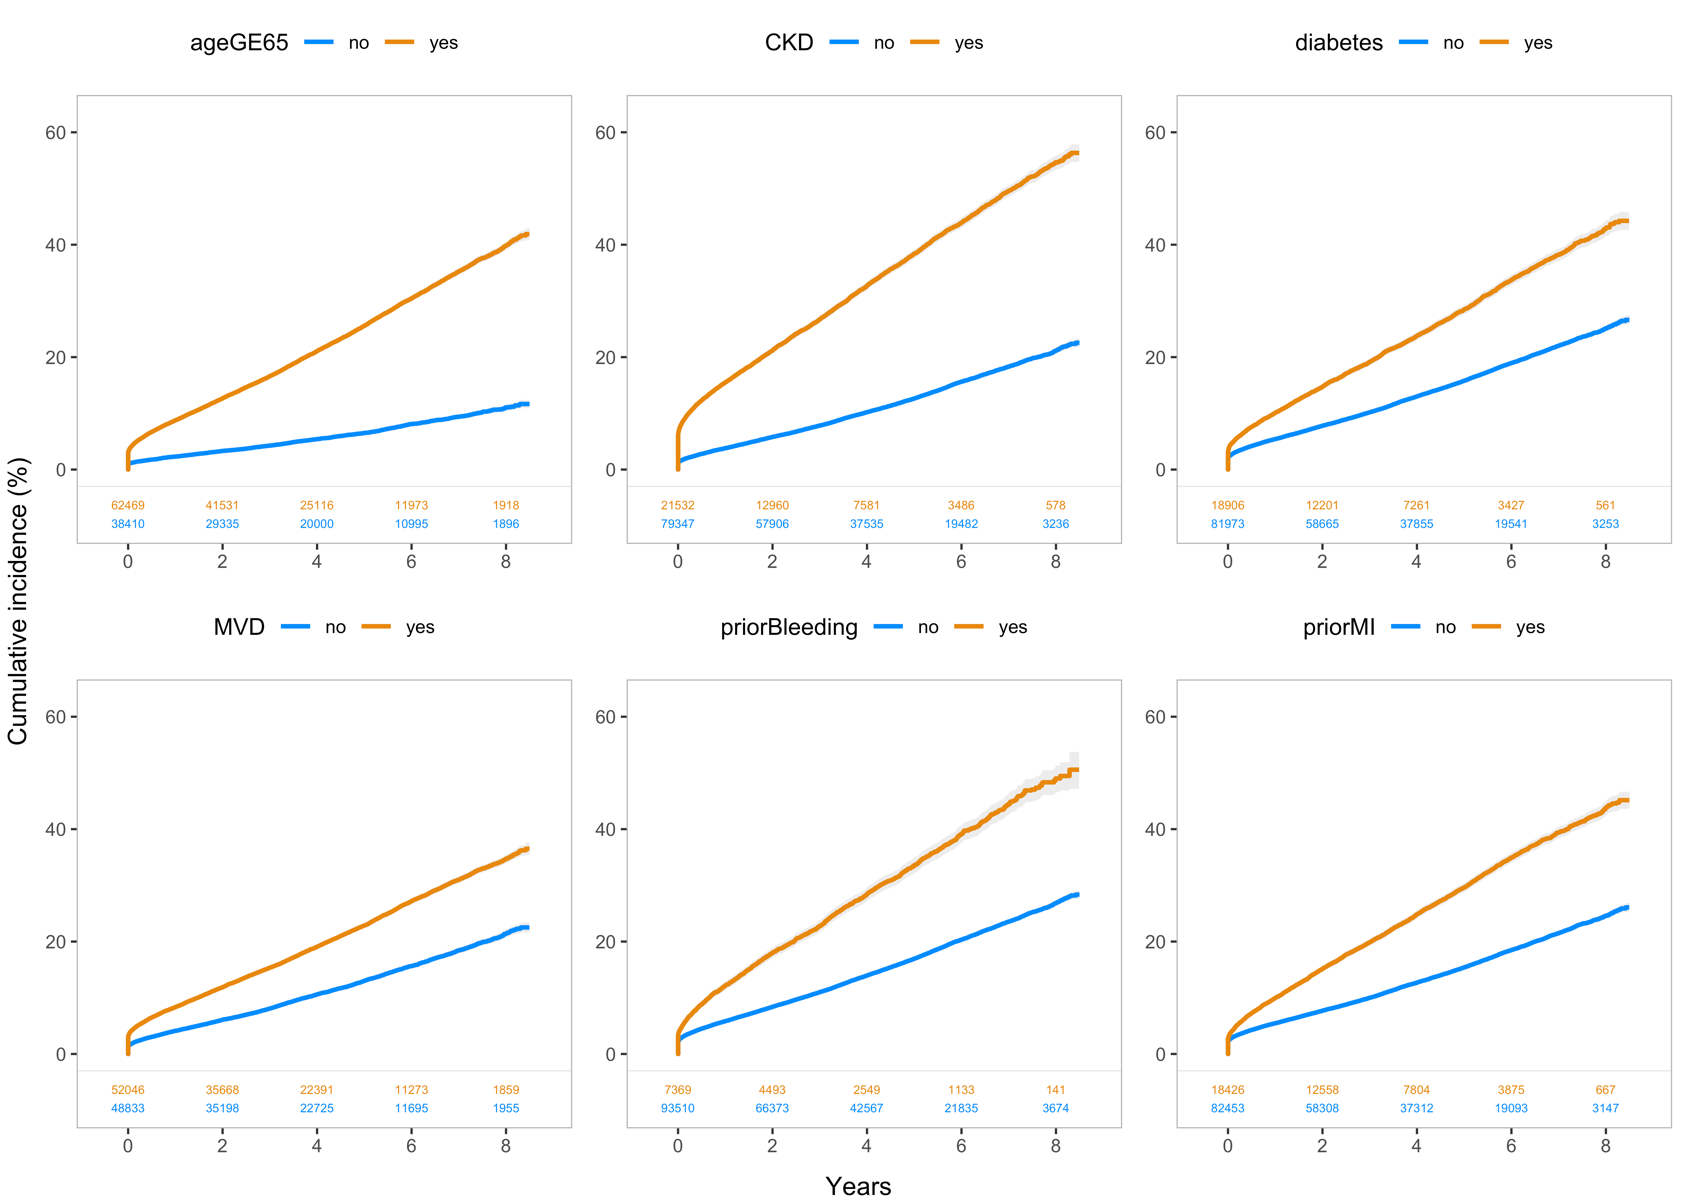


**Figure S2:** Landmark analysis assessing events from 1 year onward in patients with event-free survival up until that time. Left column shows ischemic events (MI or stroke), right column shows major bleeding.

**Age ≥65**

**
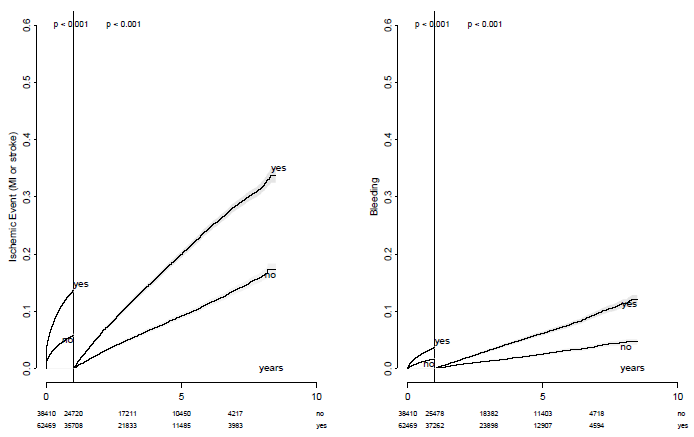
**

**CKD**

**
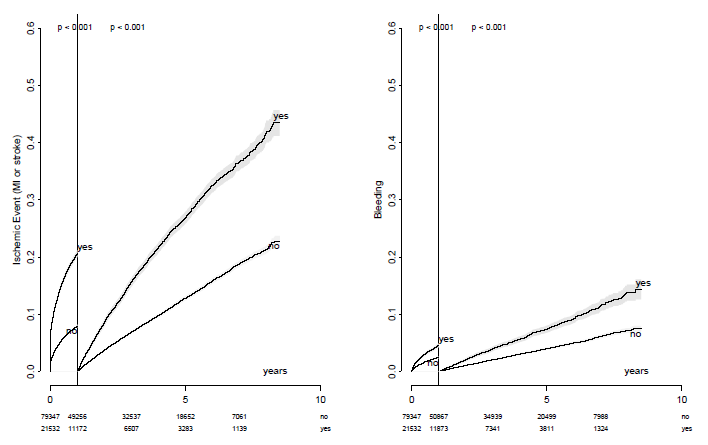
**

**Diabetes mellitus**

**
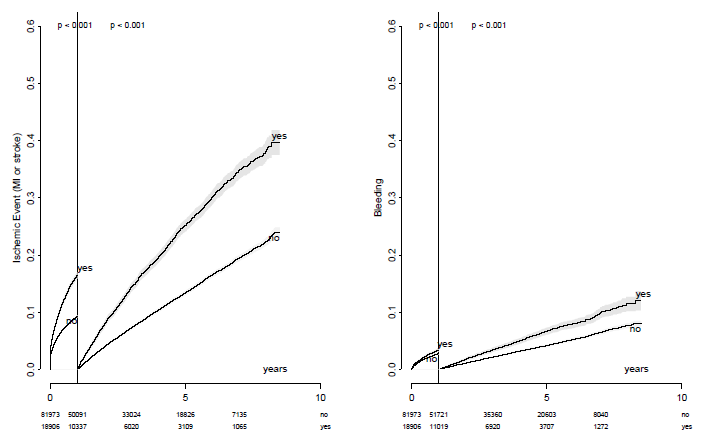
**

**MVD**

**
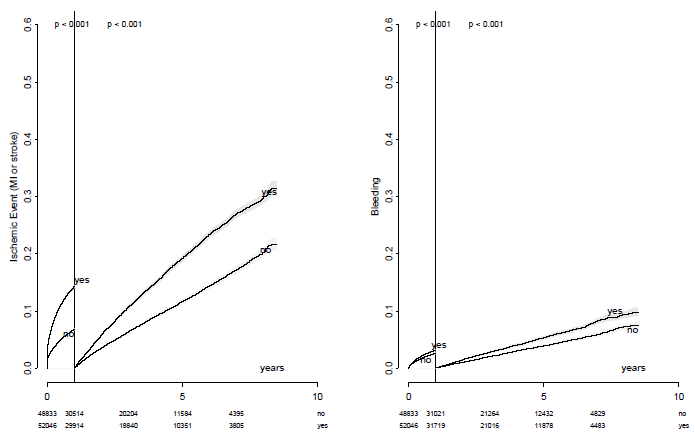
**

**Prior bleeding**

**
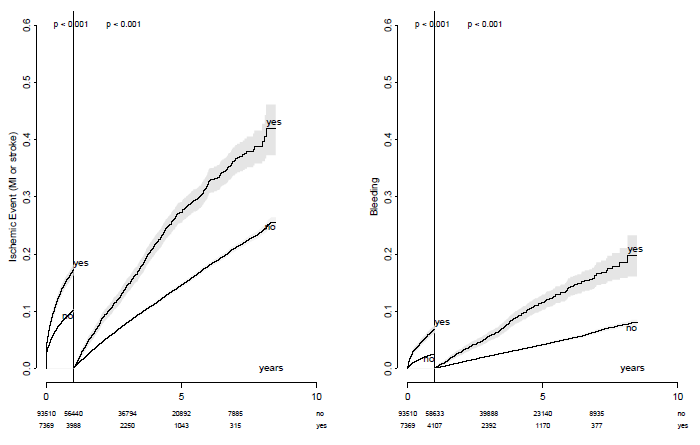
**

**Prior MI**

**
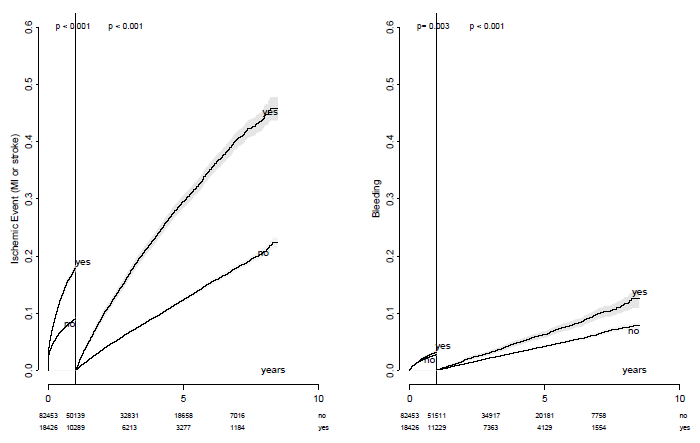
**

**Figure S3:** Kaplan-Meier estimates of CVD/MI/Stroke in relation to risk factors, censoring for death, end of follow-up and bleeding event. Risk factors: MVD (upper left), CKD (upper right), diabetes mellitus (middle left), prior MI (middle right), age greater or equal to 65 (lower left), prior bleeding (lower right).

**
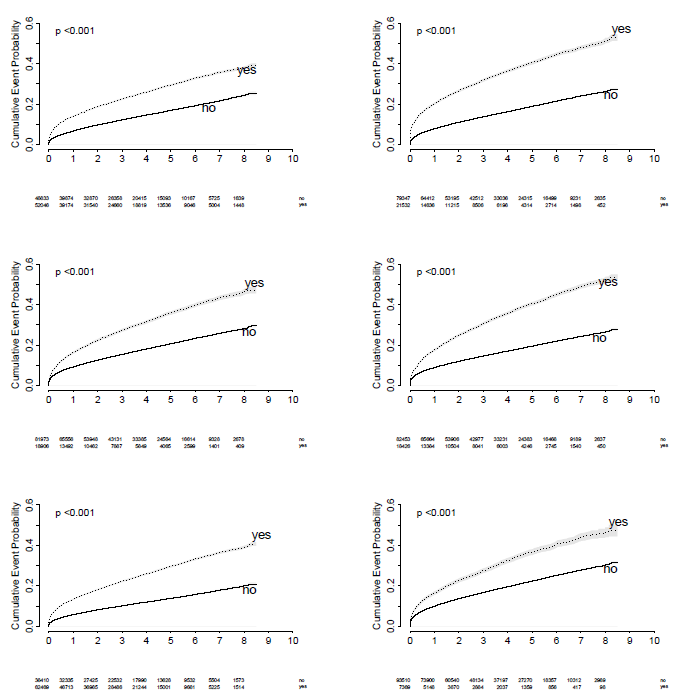
**

**Figure S4:** Kaplan-Meier estimates of major bleeding in relation to risk factors, censoring for death, end of follow-up and ischemic event. Risk factors: MVD (upper left), CKD (upper right), diabetes mellitus (middle left), prior MI (middle right), age greater or equal to 65 (lower left), prior bleeding (lower right).

**
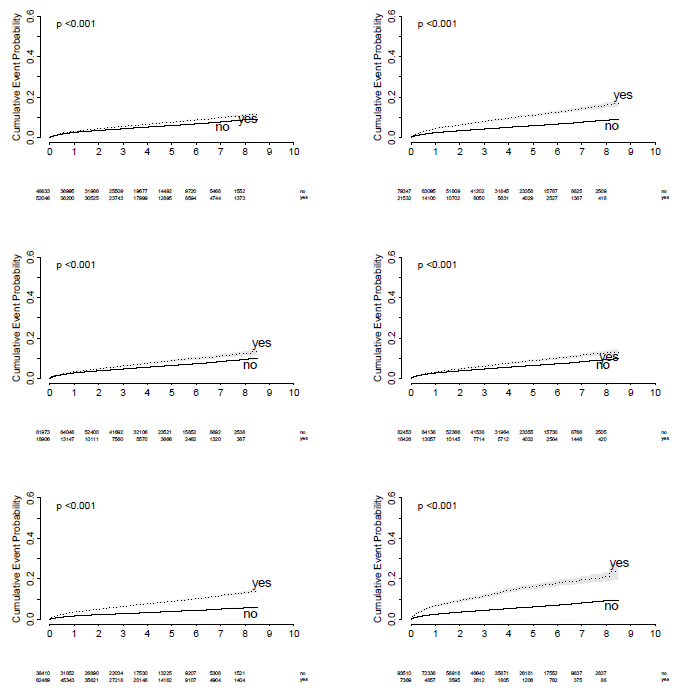
**

**Figure S2:** Combinations of risk factors (including also combinations with less than 30 patients)
